# Supplementary material for: Metformin Mitigates Nickel-Elicited Angiopoietin-Like Protein 4 Expression via HIF-1α for Lung Tumorigenesis
Source: MDPI journal article supplement (doi:10.3390/ijms21020619), 2020-01-17
Supplement: s1 [file s1]

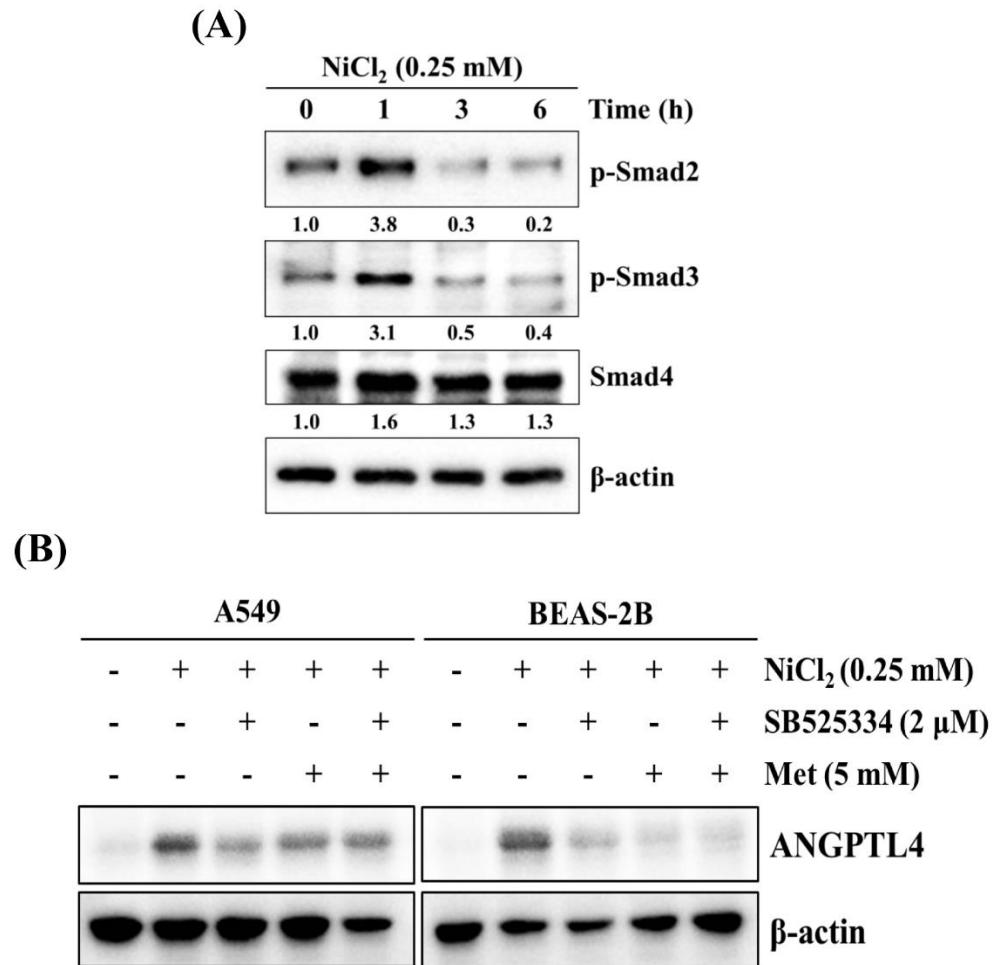

**Supplementary FigureS1. NiCl<sub>2</sub> increases the expression of ANGPTL4 via TGF-β signaling pathway.**

(A) BEAS-2B cells were treated with 0.25 mM NiCl<sub>2</sub> for 0, 1, 3 and 6 h, The protein levels of p-smad2, p-smad3 and smad4 were analyzed by Western blot. (B) A549 and BEAS-2B cells were treated with SB525334 (2μM) and/or metformin (5 mM) underling NiCl<sub>2</sub> exposure for 24 h, the protein expression of ANGPTL4 was performed. β-actin was used as the internal control.

**Supplemental Table S1. Primers list for expression analysis.**

| Analysis | Gene symbol                   | Forward (5'-3')        | Reverse (5'-3')             |
|----------|-------------------------------|------------------------|-----------------------------|
| Q-PCR    | ANGPTL4                       | CTCCACTTGGGACCAGGATC A | ATGGCTGCAGGTGCCAAAC         |
|          | HIF-1 $\alpha$                | TAGCCGAGGAAGAAGTATGAAC | CACACTGAGGTTGGTTACTG<br>TTG |
|          | $\beta$ -actin                | TCATCACCATTGGCAATGAG   | CACTGTGTTGGCGTACAGGT        |
| CHIP     | ANGPTL4-<br>promoter-<br>HRE1 | GACGGTGACCATCTGAACCT   | TCCAAGCCAGCTCATTCTCT        |
|          | ANGPTL4-<br>promoter-<br>HRE3 | GGCTG GTCTG GAAGT CTTG | GGGCGGAGGAGTCTTGG           |
